# Supplementary material for: The Prolonged Effect of Shift Work and the Impact of Reducing the Number of Nightshifts on Arterial Stiffness—A 4-Year Follow-Up Study
Source: MDPI journal article supplement (doi:10.3390/jcdd10020070), 2023-02-06
Supplement: s1 [file s1]

**Supplementary Table S1.** Selected cardiovascular variables among shift workers at the two plants over the last year of follow-up.

| Outcome       | Nobs-<br>Plant<br>A | Npers-<br>Plant A | Change<br>-Plant<br>A | Lower-<br>Plant A | Upper-<br>Plant A | Nobs-<br>Plant B | Npers-<br>Plant B | Change<br>-Plant<br>B | Lower-<br>Plant B | Upper-<br>Plant B | Diff-<br>Change | Lower-<br>Change | Upper-<br>Change | p-<br>Value |
|---------------|---------------------|-------------------|-----------------------|-------------------|-------------------|------------------|-------------------|-----------------------|-------------------|-------------------|-----------------|------------------|------------------|-------------|
| sBP<br>(mmHg) | 62                  | 36                | 2.97                  | -9.21             | 15.16             | 47               | 26                | 8.25                  | -4.02             | 20.52             | 5.28            | -0.61            | 11.16            | 0.08        |
| dBp<br>(mmHg) | 62                  | 36                | 1.22                  | -7.93             | 10.37             | 47               | 26                | 3.00                  | -6.29             | 12.30             | 1.78            | -2.64            | 6.21             | 0.43        |
| AP<br>(mmHg)  | 62                  | 36                | -1.80                 | -10.10            | 6.51              | 47               | 26                | 0.10                  | -8.38             | 8.58              | 1.90            | -2.11            | 5.90             | 0.35        |
| cPP<br>(mmHg) | 62                  | 36                | 0.06                  | -8.14             | 8.26              | 47               | 26                | 2.91                  | -5.47             | 11.28             | 2.85            | -1.12            | 6.82             | 0.16        |
| cSP<br>(mmHg) | 62                  | 36                | 3.37                  | -9.63             | 16.38             | 47               | 26                | 5.10                  | -8.13             | 18.33             | 1.73            | -4.56            | 8.02             | 0.60        |
| cDP<br>(mmHg) | 62                  | 36                | 3.65                  | -4.66             | 11.97             | 47               | 26                | 2.76                  | -5.66             | 11.18             | -0.89           | -4.91            | 3.13             | 0.66        |
| PWV<br>(m/s)  | 61                  | 35                | 0.03                  | -0.99             | 1.05              | 47               | 26                | 0.09                  | -0.93             | 1.11              | 0.06            | -0.43            | 0.55             | 0.81        |

Nobs/Npers: total number of measurements and individuals during follow-up. All analyses were adjusted for physical activity with a high degree of intensity (min/week), being a daily smoker, pack-years, age at baseline, and sex; sBP, systolic blood pressure; dBp, diastolic blood pressure; AP, augmentation pressure; cPP, central pulse pressure; cSP, central systolic aorta pressure; cDP, central diastolic aorta pressure; PWV, pulse wave velocity.

**Supplementary Table S2.** Annual change in selected variables in shift workers comparing the new 12-shift schedule with the ordinary 5-shift schedule. All available measurements from both plants are utilised in the analysis.

| Outcome     | 12-Shift vs. 5-Shift in<br>Annual Change | Lower | Upper | p-Value | p-Corr |
|-------------|------------------------------------------|-------|-------|---------|--------|
| sBP (mm Hg) | 5.39                                     | -1.49 | 12.26 | 0.12    | 0.50   |
| dBp (mmHg)  | 27.5                                     | -0.92 | 6.43  | 0.14    | 0.50   |
| AP (mmHg)   | -0.54                                    | -3.14 | 2.05  | 0.68    | 0.82   |
| cPP (mmHg)  | 1.01                                     | -2.37 | 4.39  | 0.56    | 0.82   |
| cSP (mmHg)  | 1.10                                     | -4.51 | 6.71  | 0.70    | 0.82   |
| cDP (mmHg)  | 0.09                                     | -3.86 | 4.05  | 0.96    | 0.96   |
| PWV (m/s)   | -0.26                                    | -0.81 | 0.30  | 0.37    | 0.82   |

sBP, systolic blood pressure; dBp, diastolic blood pressure; AP, augmentation pressure; cPP, central pulse pressure; cSP, central systolic aorta pressure; cDP, central diastolic aorta pressure; PWV, pulse wave velocity.
